# Supplementary material for: Survival of glioblastoma in relation to tumor location: a statistical tumor atlas of a population-based cohort
Source: PubMed Central journal article supplement (PMC8195961; doi:10.1007/s00701-021-04802-6), 2021-03-20
Supplement: 701_2021_4802_MOESM4_ESM.pdf [file 701_2021_4802_MOESM4_ESM.pdf]

## Online Resource 4

Article title: Survival of glioblastoma in relation to tumor location: A statistical tumor atlas of a population-based cohort

Journal: Acta Neurochirurgica

Even Hovig Fyllingen PhD, Lars Eirik Bø PhD, Ingerid Reinertsen PhD, Asgeir Store Jakola PhD, Lisa Millgård Sagberg PhD, Erik Magnus Berntsen PhD, Øyvind Salvesen PhD, Ole Solheim PhD

Corresponding author:

Even Hovig Fyllingen

Department of Radiology, St. Olavs Hospital, Trondheim University Hospital, Prinsesse Kristinas Gate 1, 7006 Trondheim, Norway

E-mail: [even.hovig.fyllingen@gmail.com](mailto:even.hovig.fyllingen@gmail.com)

### Online Resource 4

Odds ratio (OR) of receiving adjuvant radiochemotherapy by patient and tumor characteristics ( $N = 206$ )

|                                    | Univariable          |          | Multivariable       |          |
|------------------------------------|----------------------|----------|---------------------|----------|
|                                    | OR (95 % CI)         | <i>P</i> | OR (95 % CI)        | <i>P</i> |
| Age (per year)                     | 0.880 (0.840-0.922)  | < 0.001  | 0.879 (0.830-0.930) | < 0.001  |
| Sex [reference female]             |                      |          |                     |          |
| Male                               | 1.383 (0.708-2.702)  | 0.343    | -                   | -        |
| Preoperative KPS [reference < 70]  |                      |          |                     |          |
| ≥ 70                               | 6.640 (3.244-13.590) | < 0.001  | 3.811 (1.660-8.749) | 0.002    |
| Preoperative tumor volume (per mL) | 0.991 (0.982-1.000)  | 0.05     | 0.993 (0.976-1.010) | 0.392    |
| TVTBA in cm                        | 1.555 (1.191-2.030)  | 0.001    | 1.531 (1.002-2.339) | 0.049    |
| Biopsy only [reference No]         |                      |          |                     |          |
| Yes                                | 0.194 (0.091-0.413)  | < 0.001  | 0.570 (0.135-2.416) | 0.446    |
| Residual tumor volume (per mL)     | 0.979 (0.966-0.992)  | 0.002    | 1.012 (0.986-1.038) | 0.374    |

<sup>a</sup> TVTB = shortest distance from center of third ventricle to preoperative contrast-enhancing tumor border.
